## CORRECTION

# Correction: Tuberculosis preventive treatment should be considered for all household contacts of pulmonary tuberculosis patients in India

The *PLOS ONE* Staff

## Notice of republication

This article was republished on August 28, 2020, to correct an error in the greater-than or equal to, and less than or equal to symbols. The publisher apologizes for the error. Please download this article again to view the correct version. The originally published, uncorrected article and the republished, corrected article are provided here for reference.

## Supporting information

**S1 File. Originally published, uncorrected article.**

(PDF)

**S2 File. Republished corrected article.**

(PDF)

## Reference

1. Paradkar M, Padmapriyadarsini C, Jain D, Shivakumar SVBY, Thiruvengadam K, Gupte AN, et al. (2020) Tuberculosis preventive treatment should be considered for all household contacts of pulmonary tuberculosis patients in India. *PLoS ONE* 15(7): e0236743. <https://doi.org/10.1371/journal.pone.0236743> PMID: 32726367

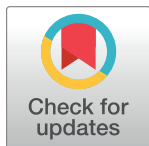

## OPEN ACCESS

**Citation:** The *PLOS ONE* Staff (2020) Correction: Tuberculosis preventive treatment should be considered for all household contacts of pulmonary tuberculosis patients in India. *PLoS ONE* 15(12): e0244914. <https://doi.org/10.1371/journal.pone.0244914>

**Published:** December 31, 2020

**Copyright:** © 2020 The PLOS ONE Staff. This is an open access article distributed under the terms of the [Creative Commons Attribution License](https://creativecommons.org/licenses/by/4.0/), which permits unrestricted use, distribution, and reproduction in any medium, provided the original author and source are credited.
